# Supplementary material for: Silver supramolecule catalyzed multicomponent reactions under mild conditions
Source: Royal Society of Chemistry journal article supplement (doi:10.1039/c2dt30134b), 2012-01-01

## *Electronic supplementary information (ESI)*

### **Silver supramolecule catalyzed multicomponent reactions under mild conditions**

**Yue Zhao,<sup>a</sup> Xin Zhou,<sup>a</sup> Taka-aki Okamura,<sup>b</sup> Min Chen,<sup>a</sup> Yi Lu,<sup>a</sup> Wei-Yin Sun,<sup>\*a</sup>  
Jin-Quan Yu<sup>c</sup>**

<sup>a</sup> *Coordination Chemistry Institute, State Key Laboratory of Coordination Chemistry, School of Chemistry and Chemical Engineering, Nanjing National Laboratory of Microstructures, Nanjing University, Nanjing 210093, China. E-mail: [sunwy@nju.edu.cn](mailto:sunwy@nju.edu.cn); Fax: +86 25 8331 4502*

<sup>b</sup> *Department of Macromolecular Science, Graduate School of Science, Osaka University, Toyonaka, Osaka 560-0043, Japan*

<sup>c</sup> *Department of Chemistry, The Scripps Research Institute, La Jolla, CA 92037, USA*

**Table S1.** Parameters of hydrogen bonds for complex **1**<sup>a</sup>.

| D-H...A                     | d(D...A) (Å) | D-H...A (°) |
|-----------------------------|--------------|-------------|
| <b>1</b>                    |              |             |
| C5-H3...O21 <sup>#1</sup>   | 2.58(5)      | 151         |
| C13-H7...O23 <sup>#2</sup>  | 3.343(3)     | 127         |
| C43-H12...O23 <sup>#2</sup> | 3.632(4)     | 159         |

<sup>a</sup> Symmetry transformation used to generate equivalent atoms: #1 -x, -y, 2-z. #2 1-x,-y,2-z



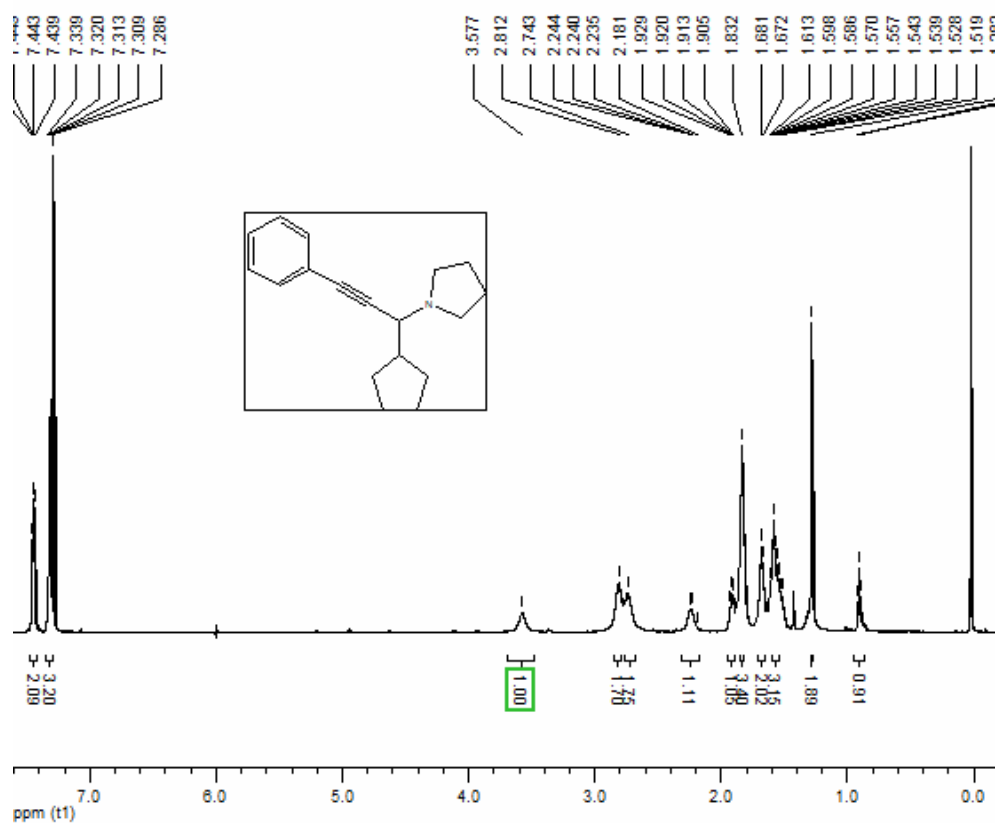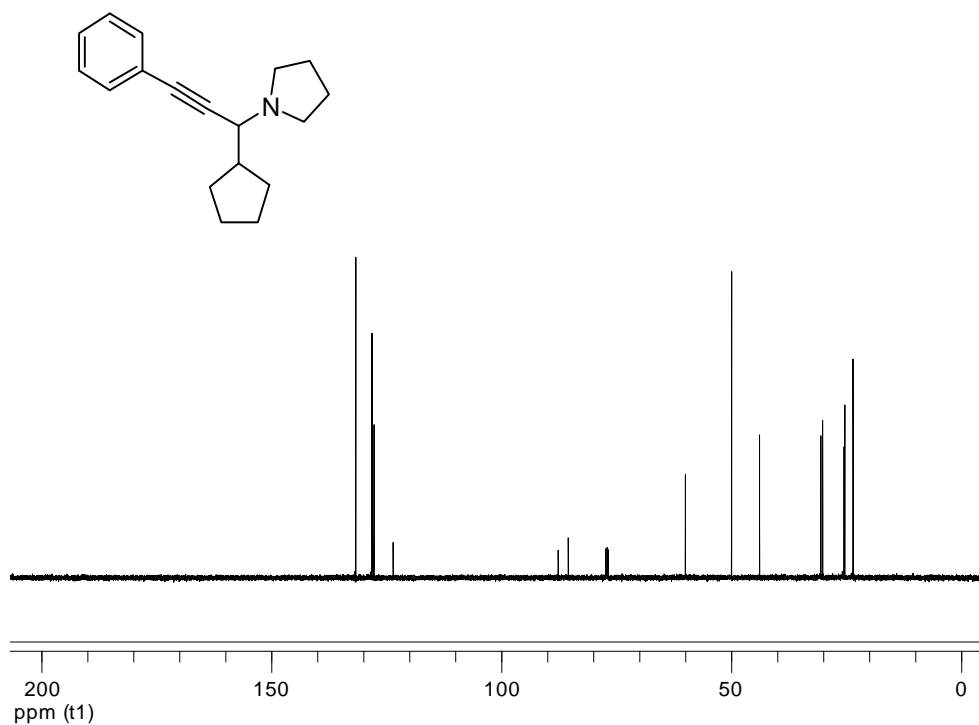

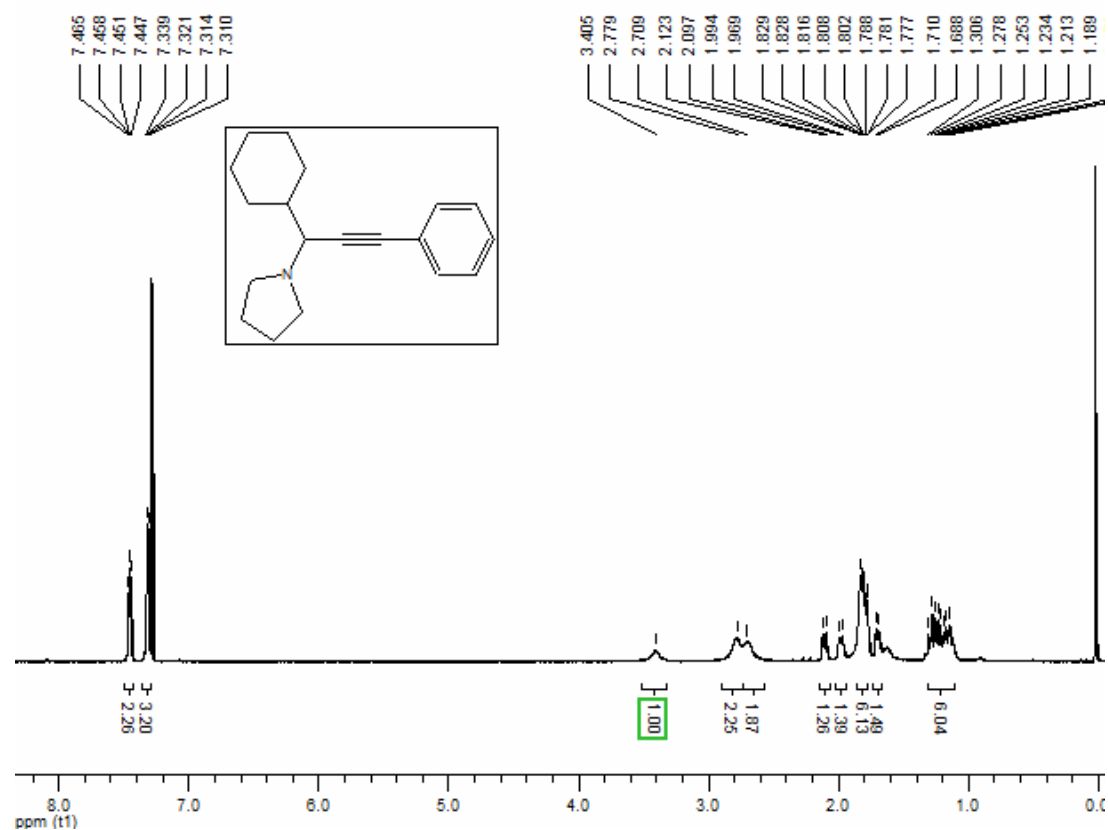

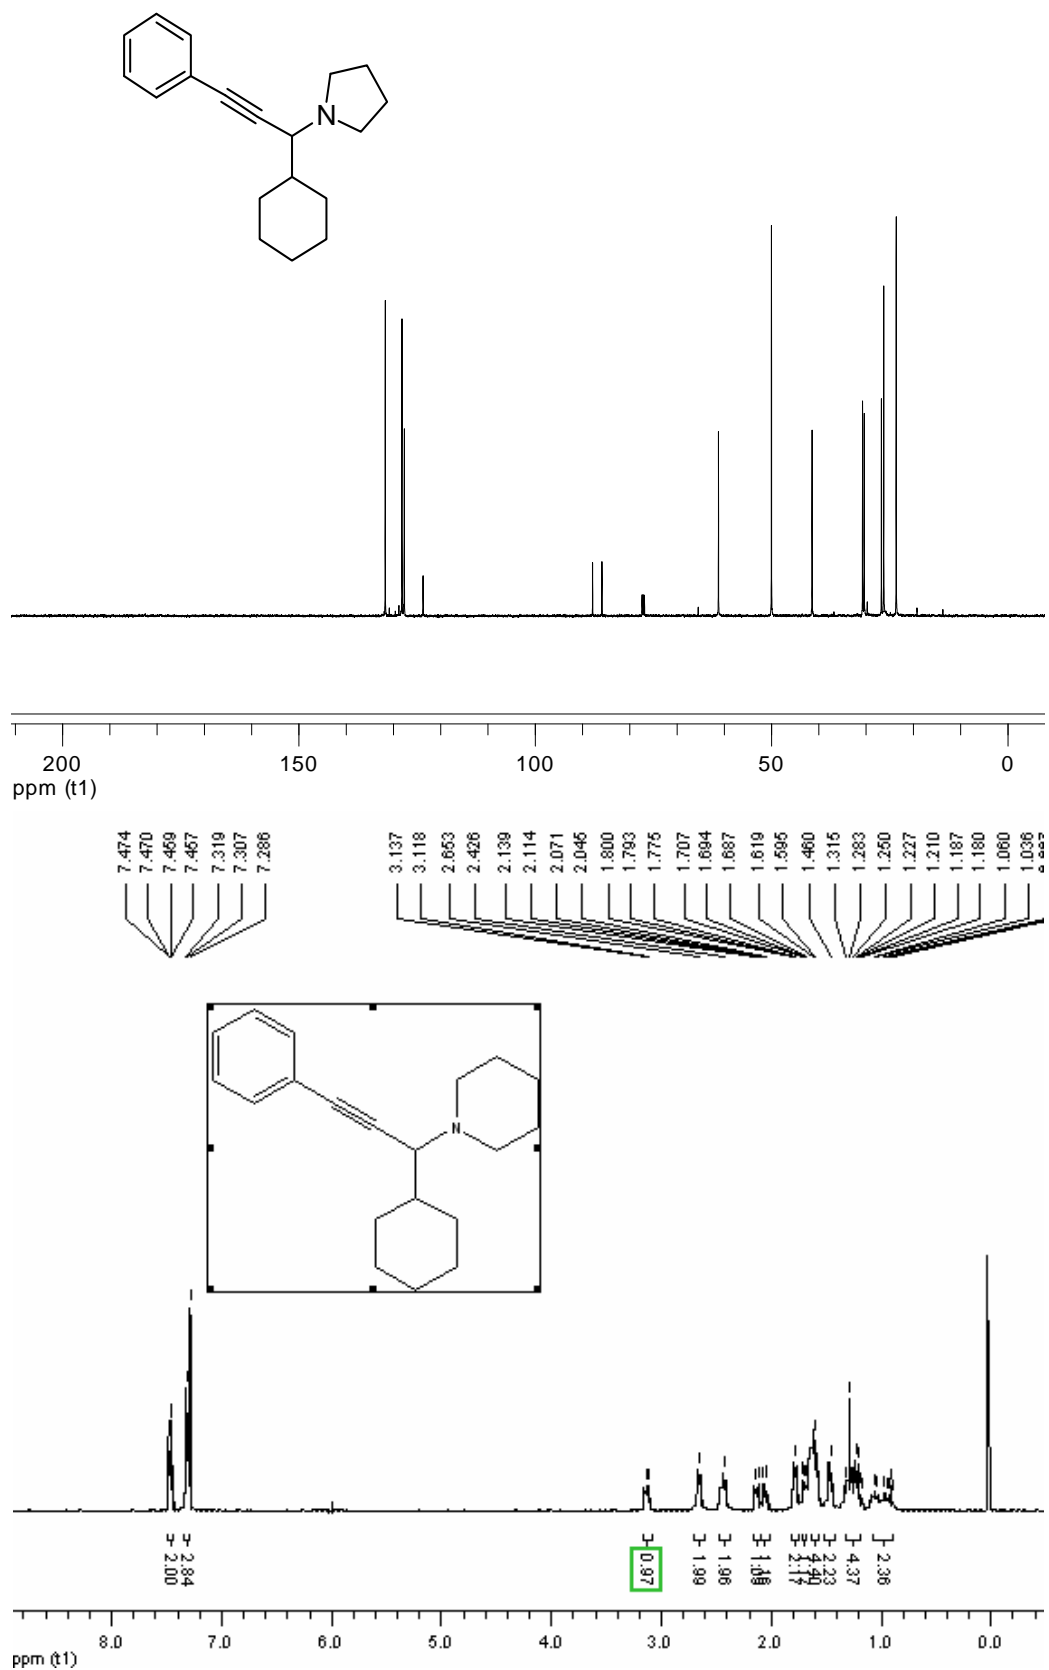

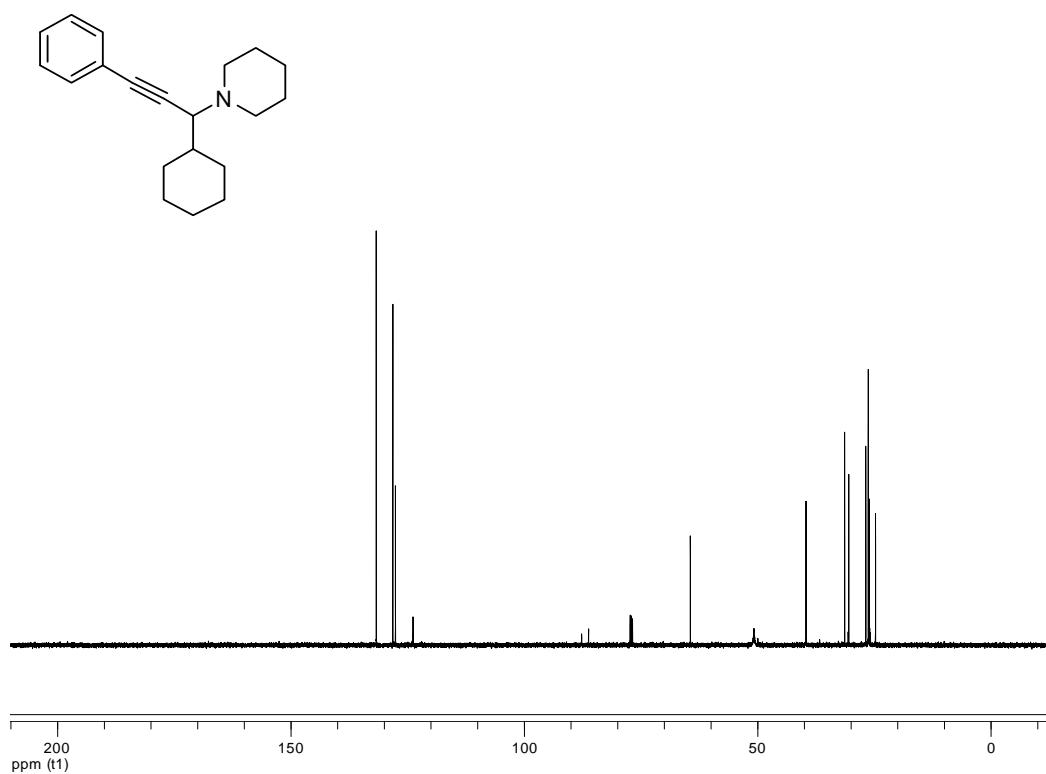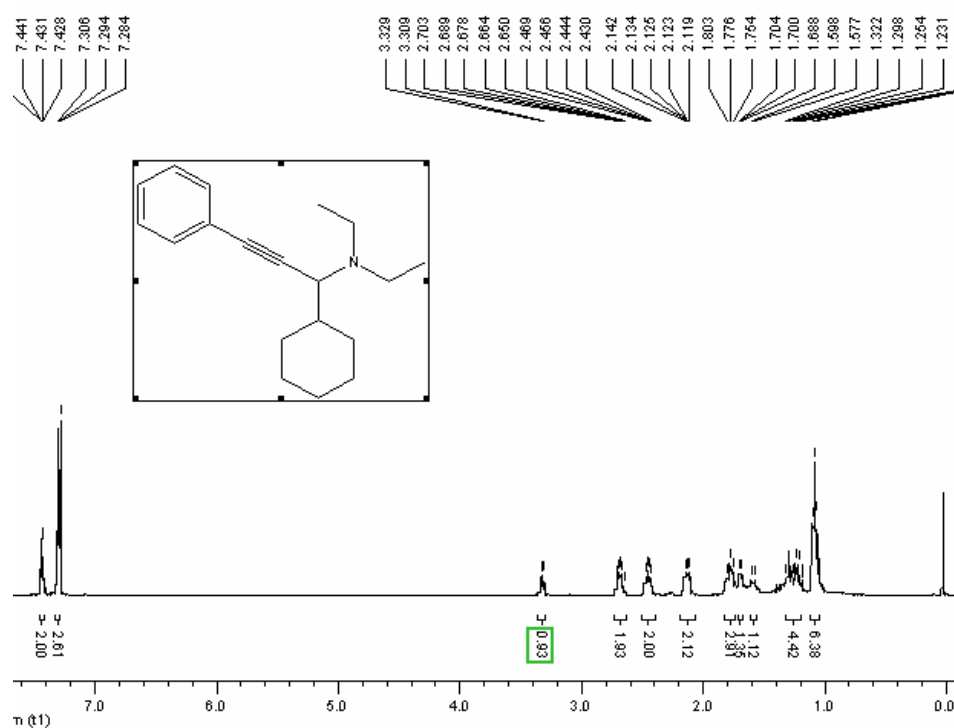

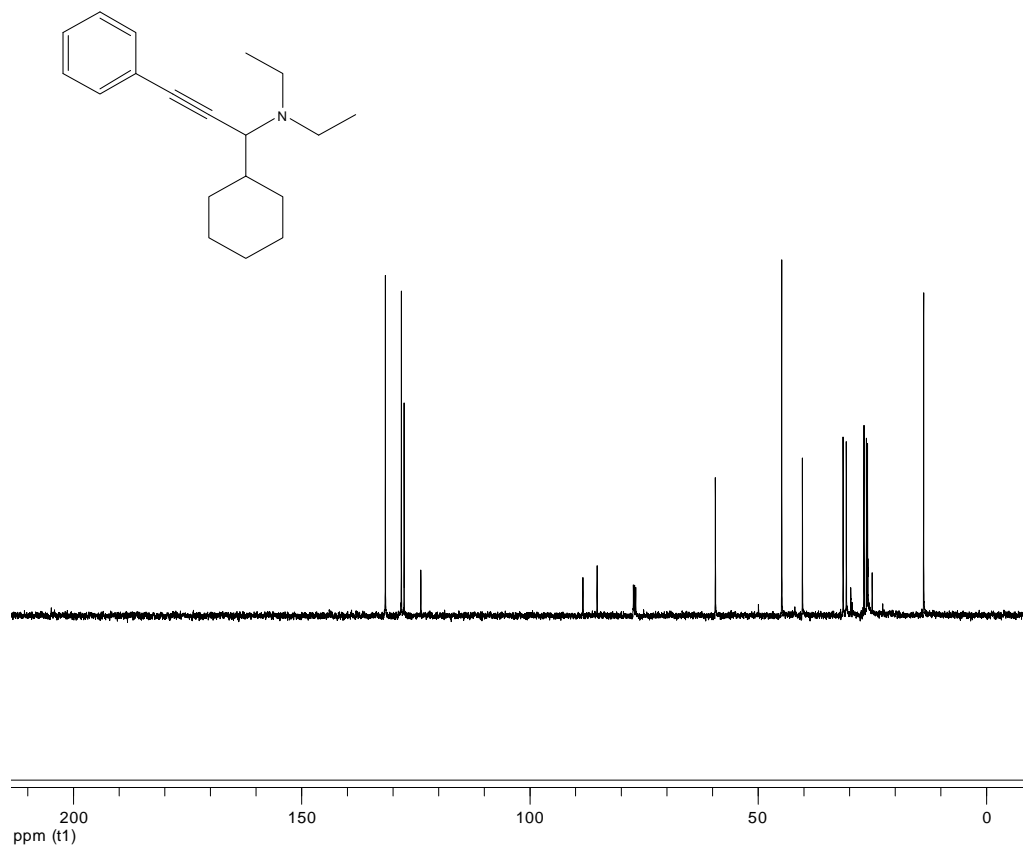

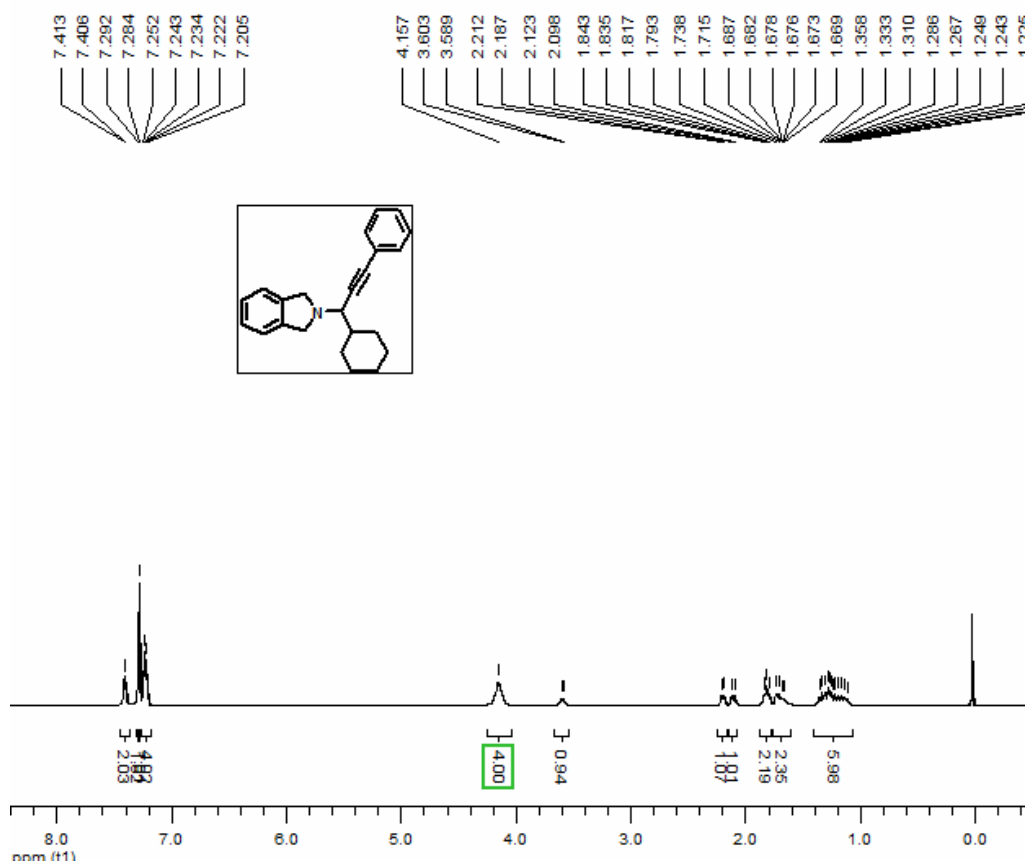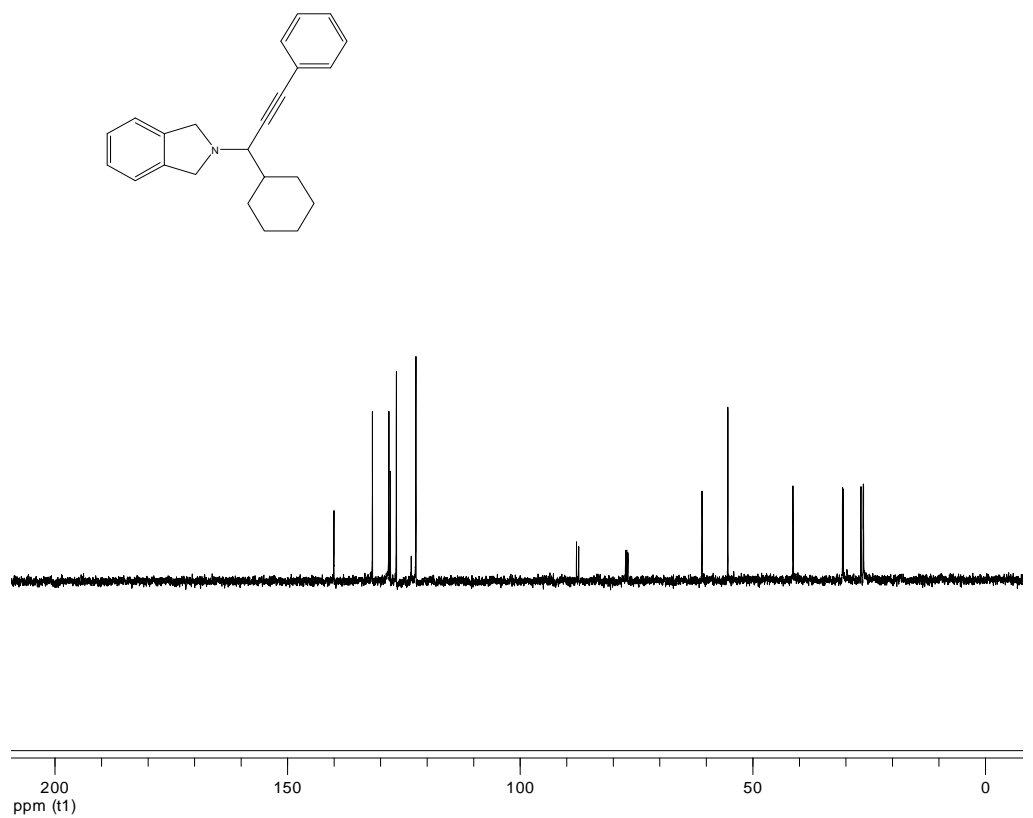



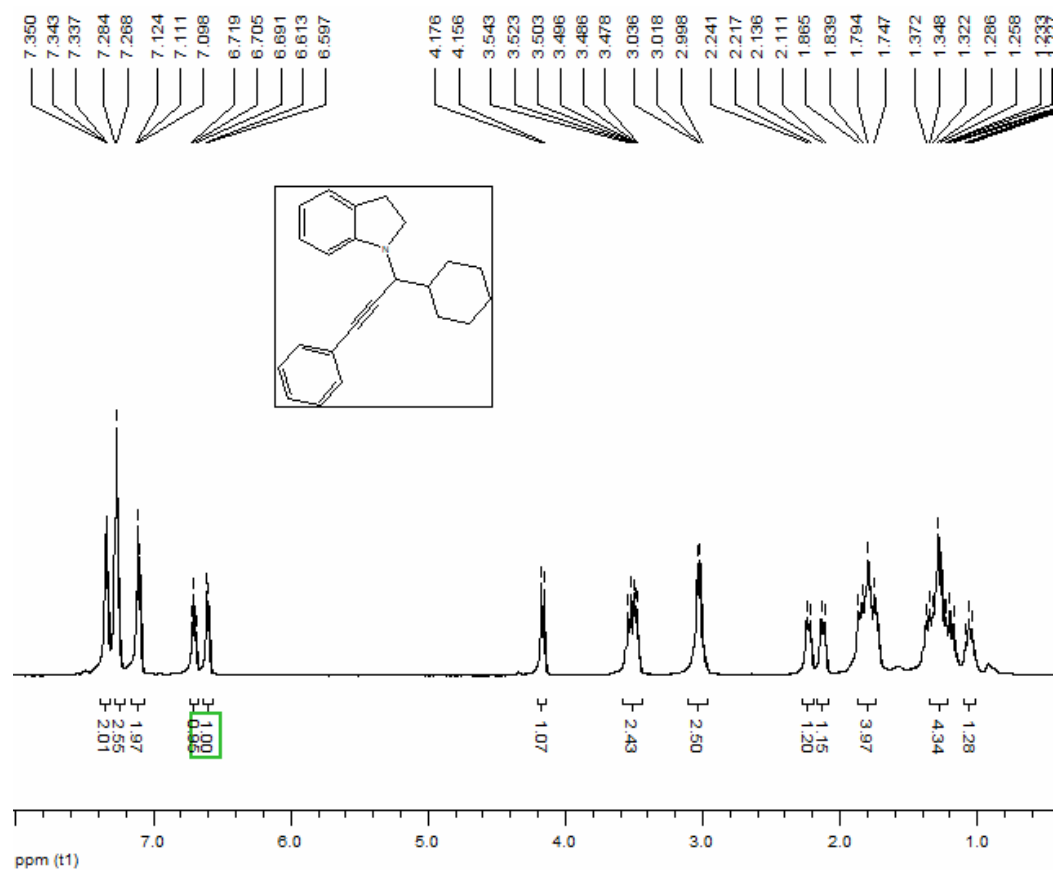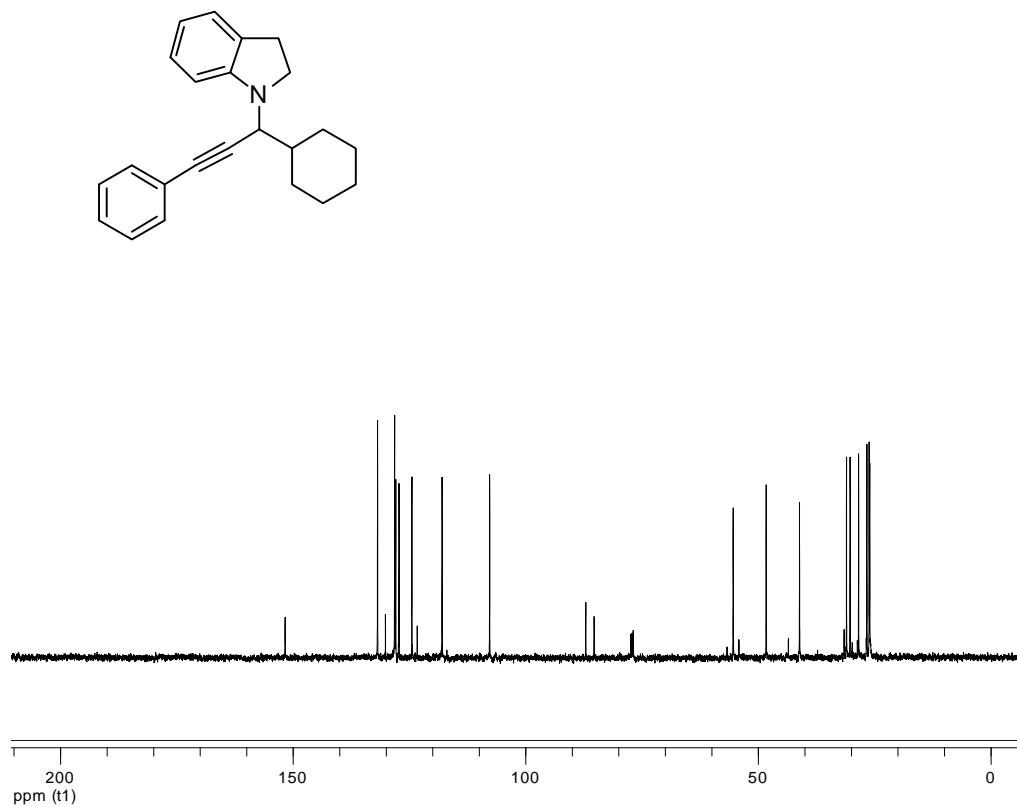

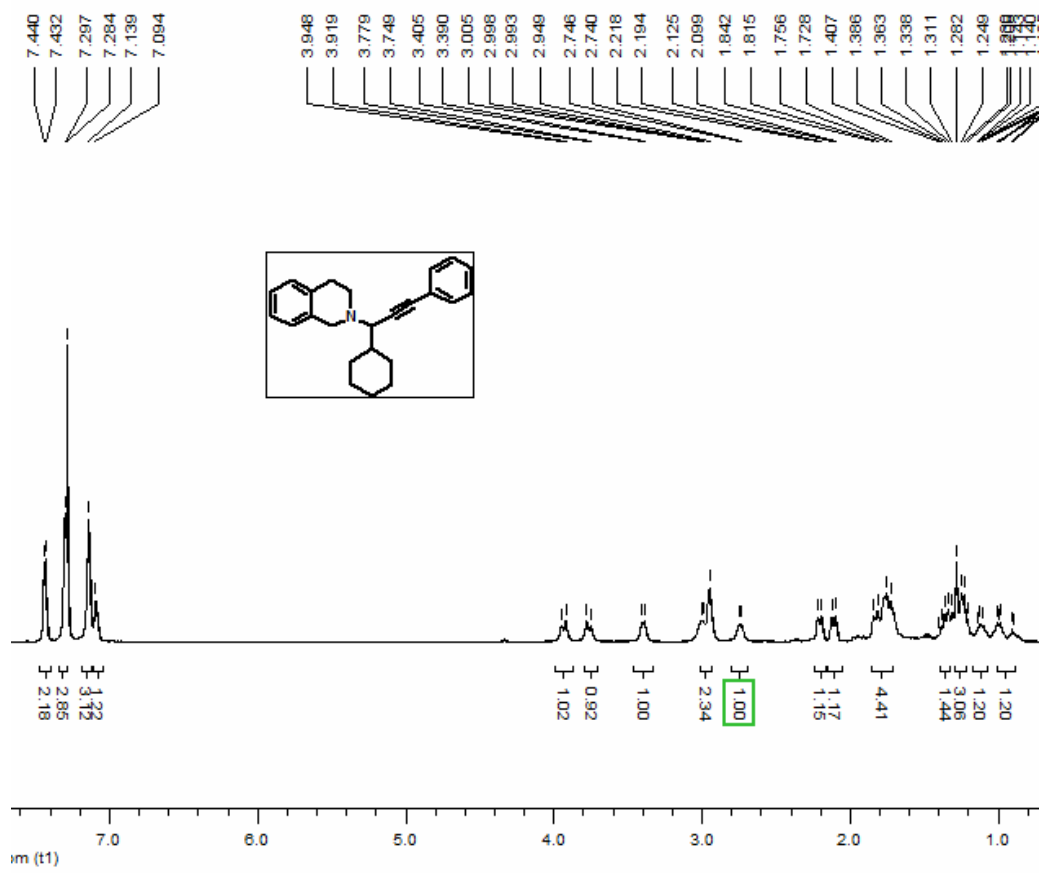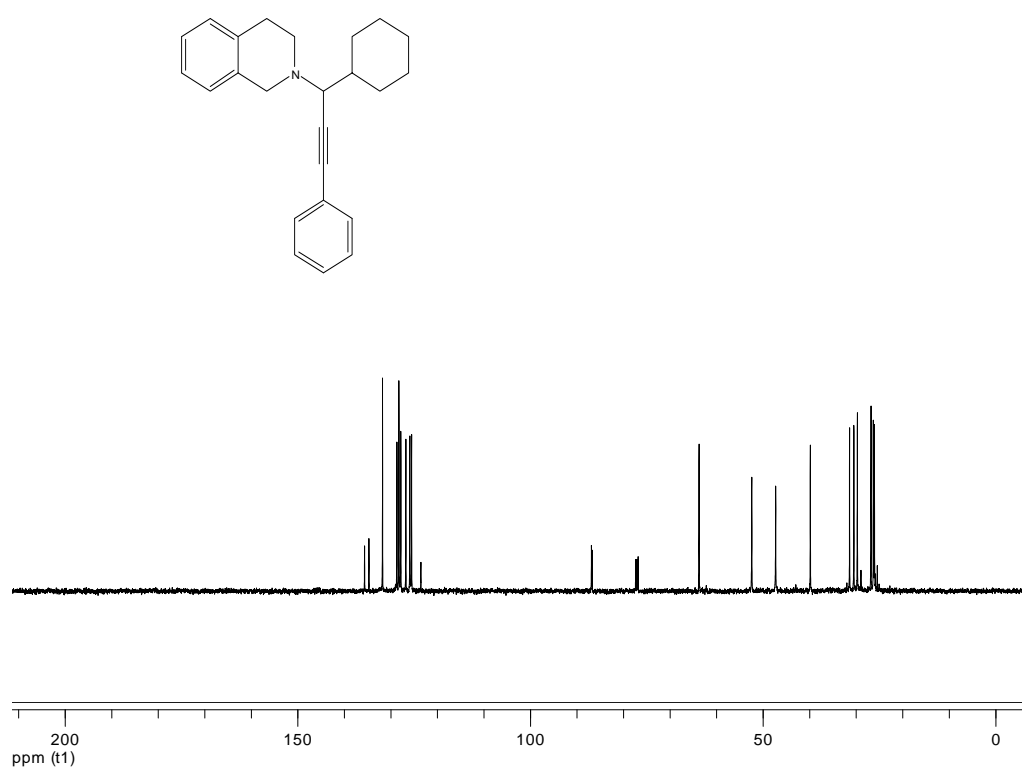

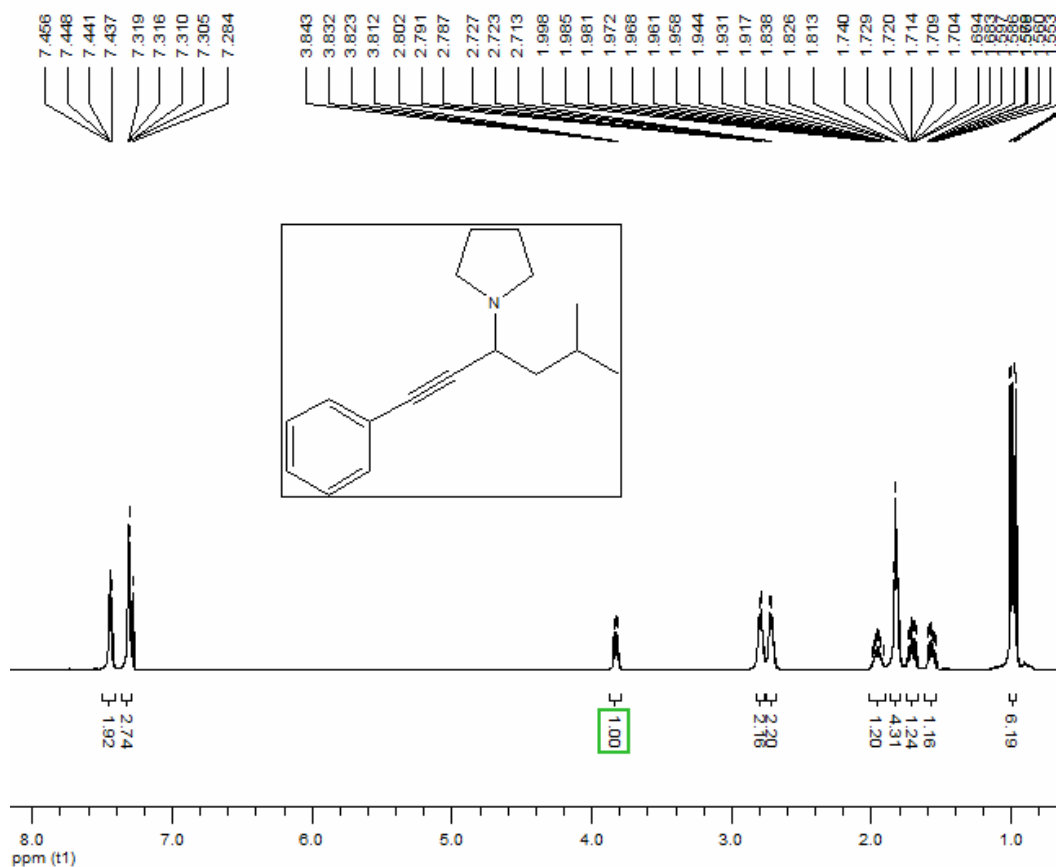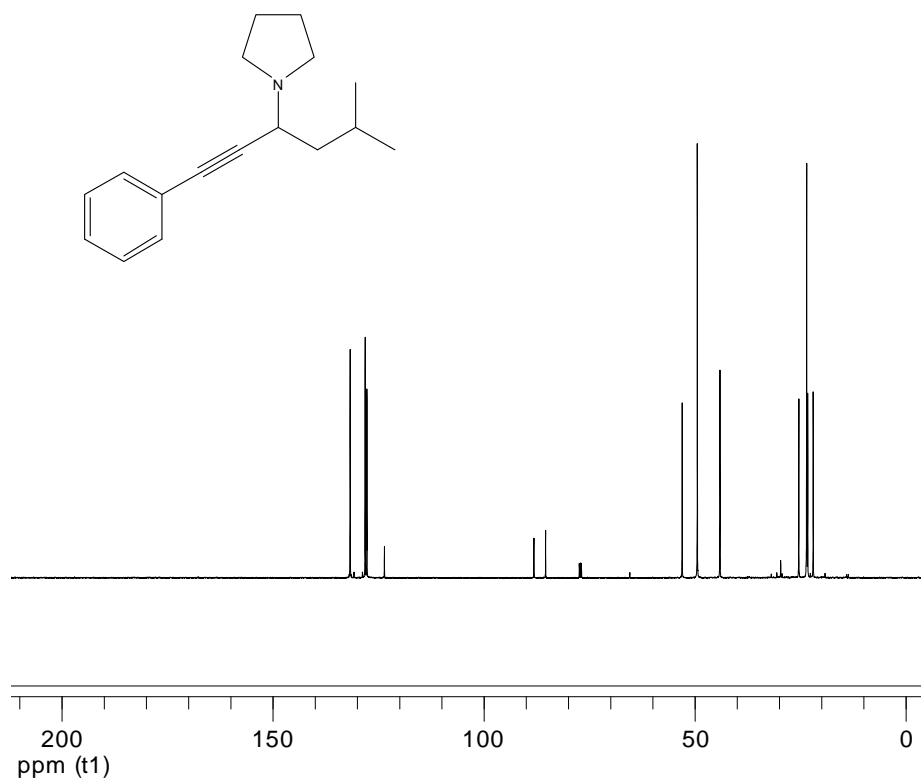

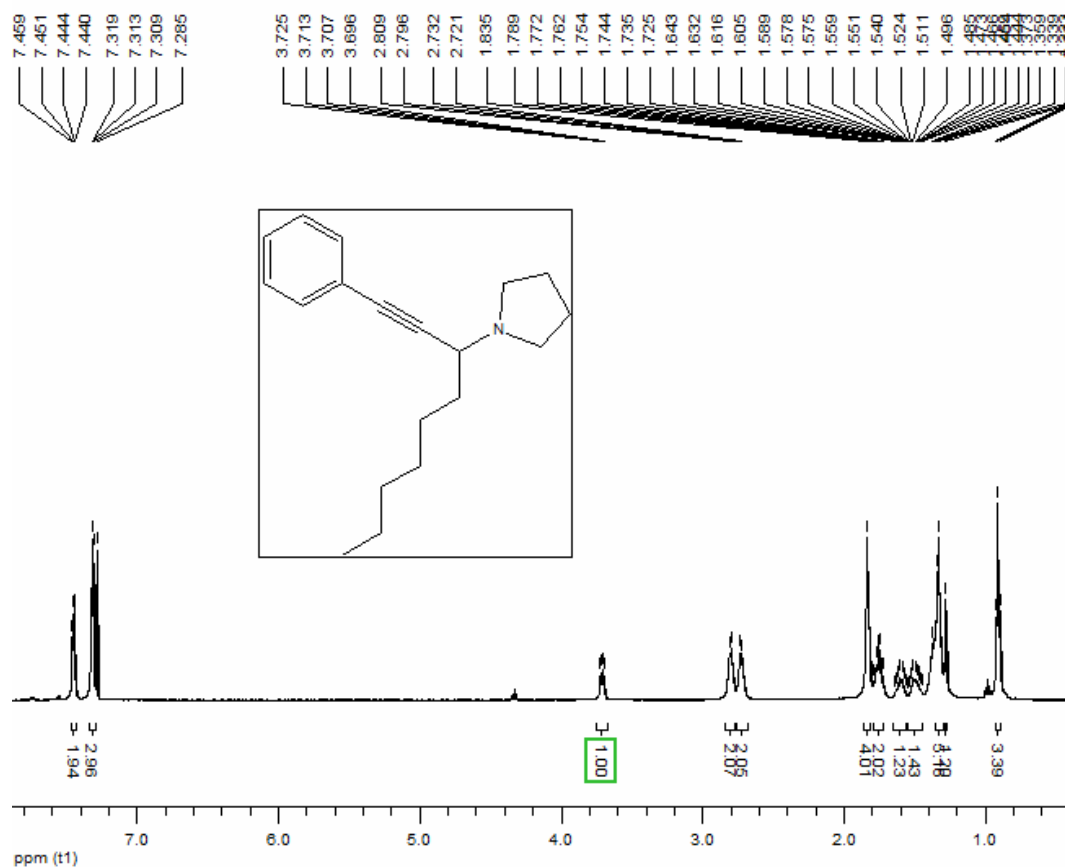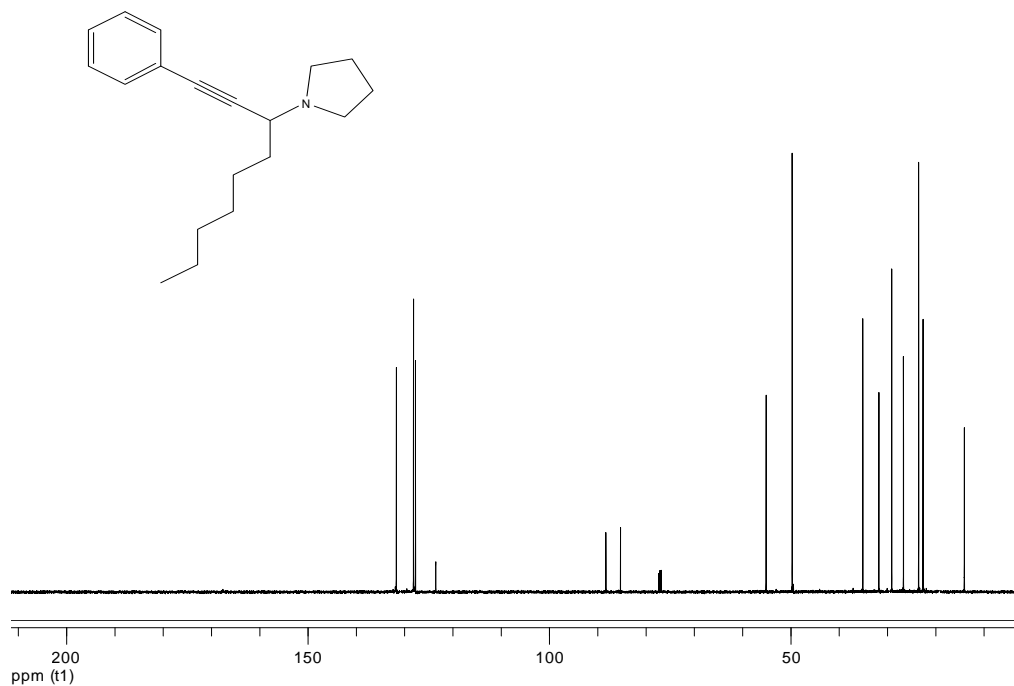



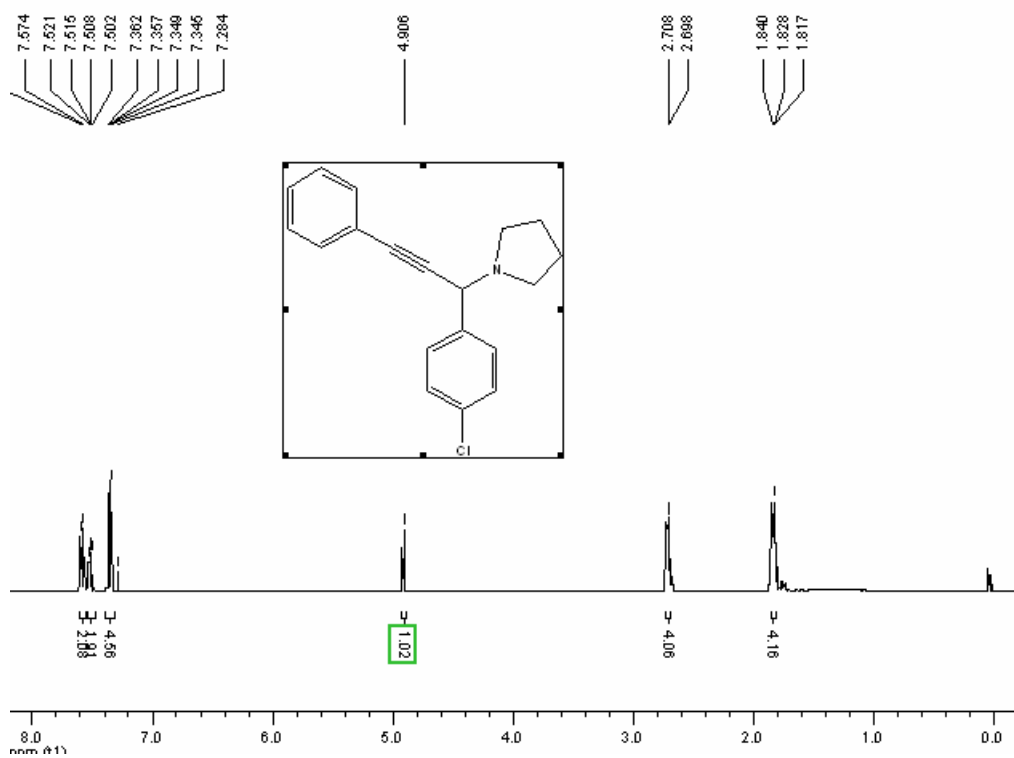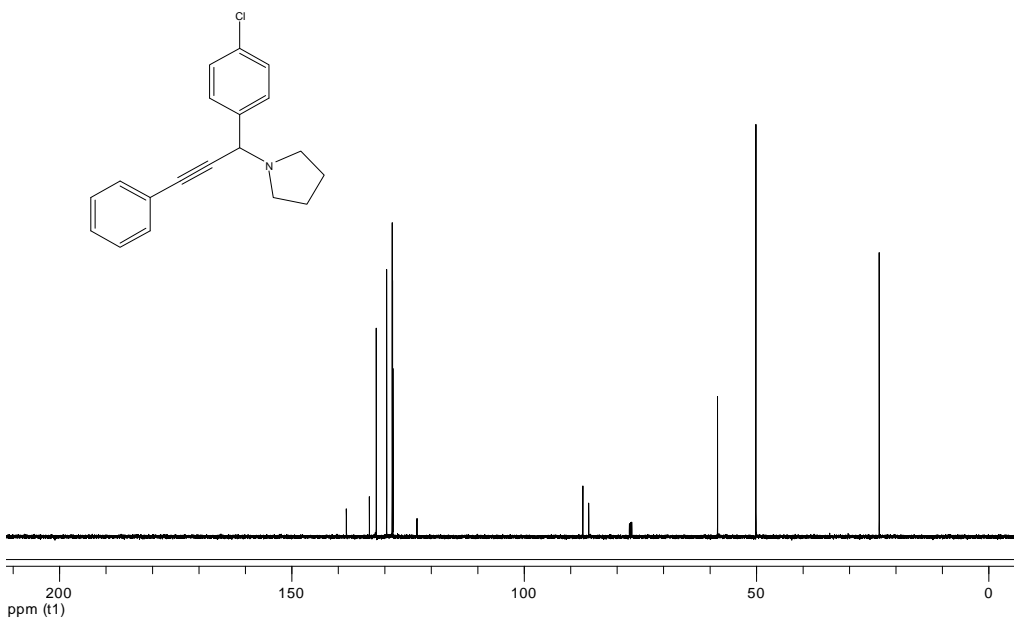

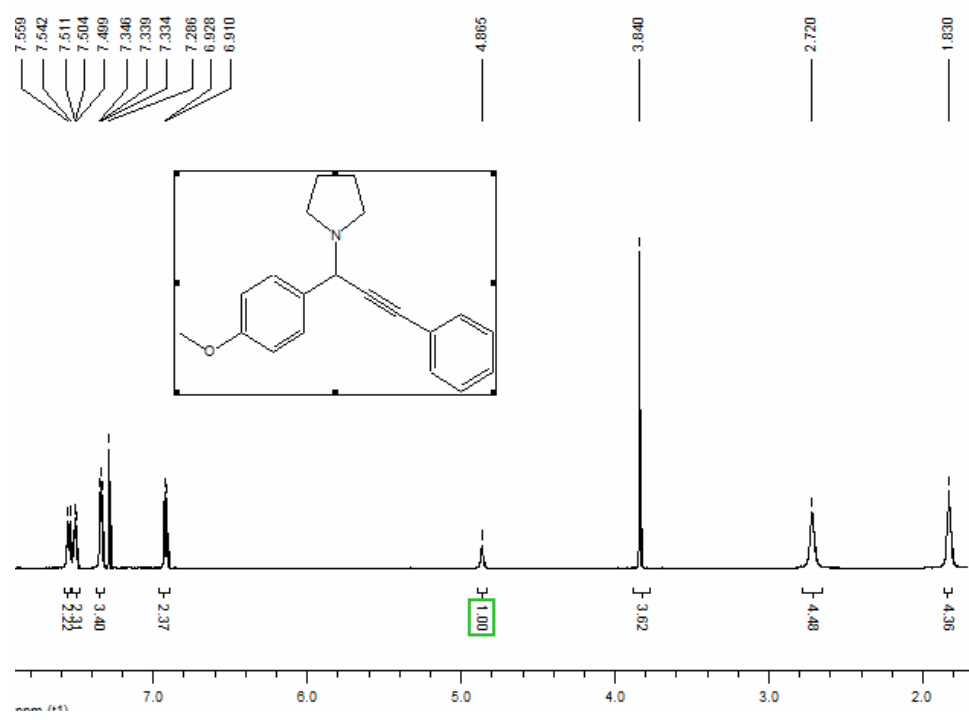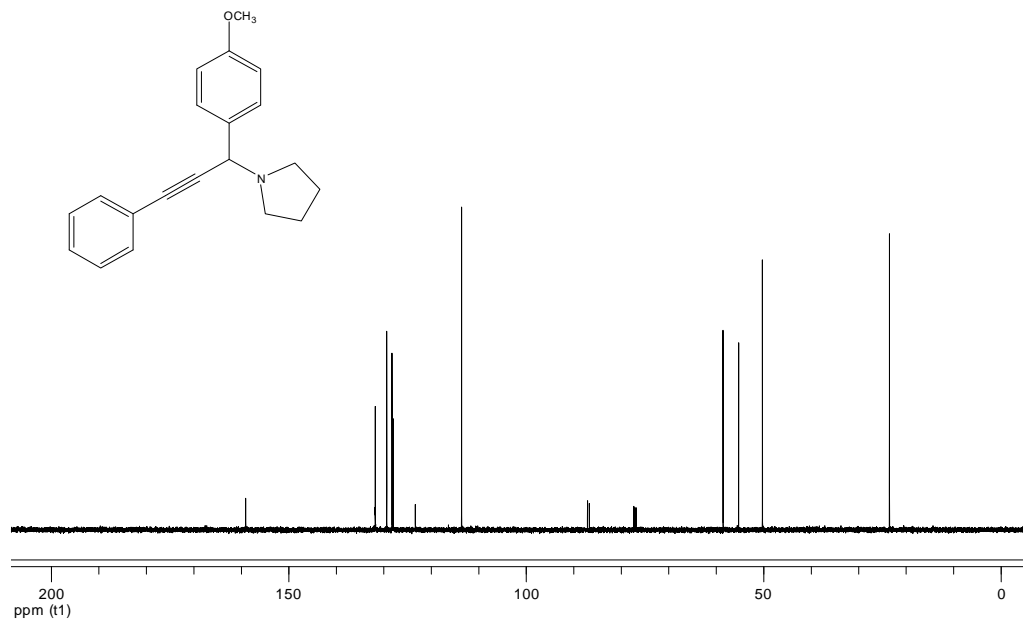

ES spectra

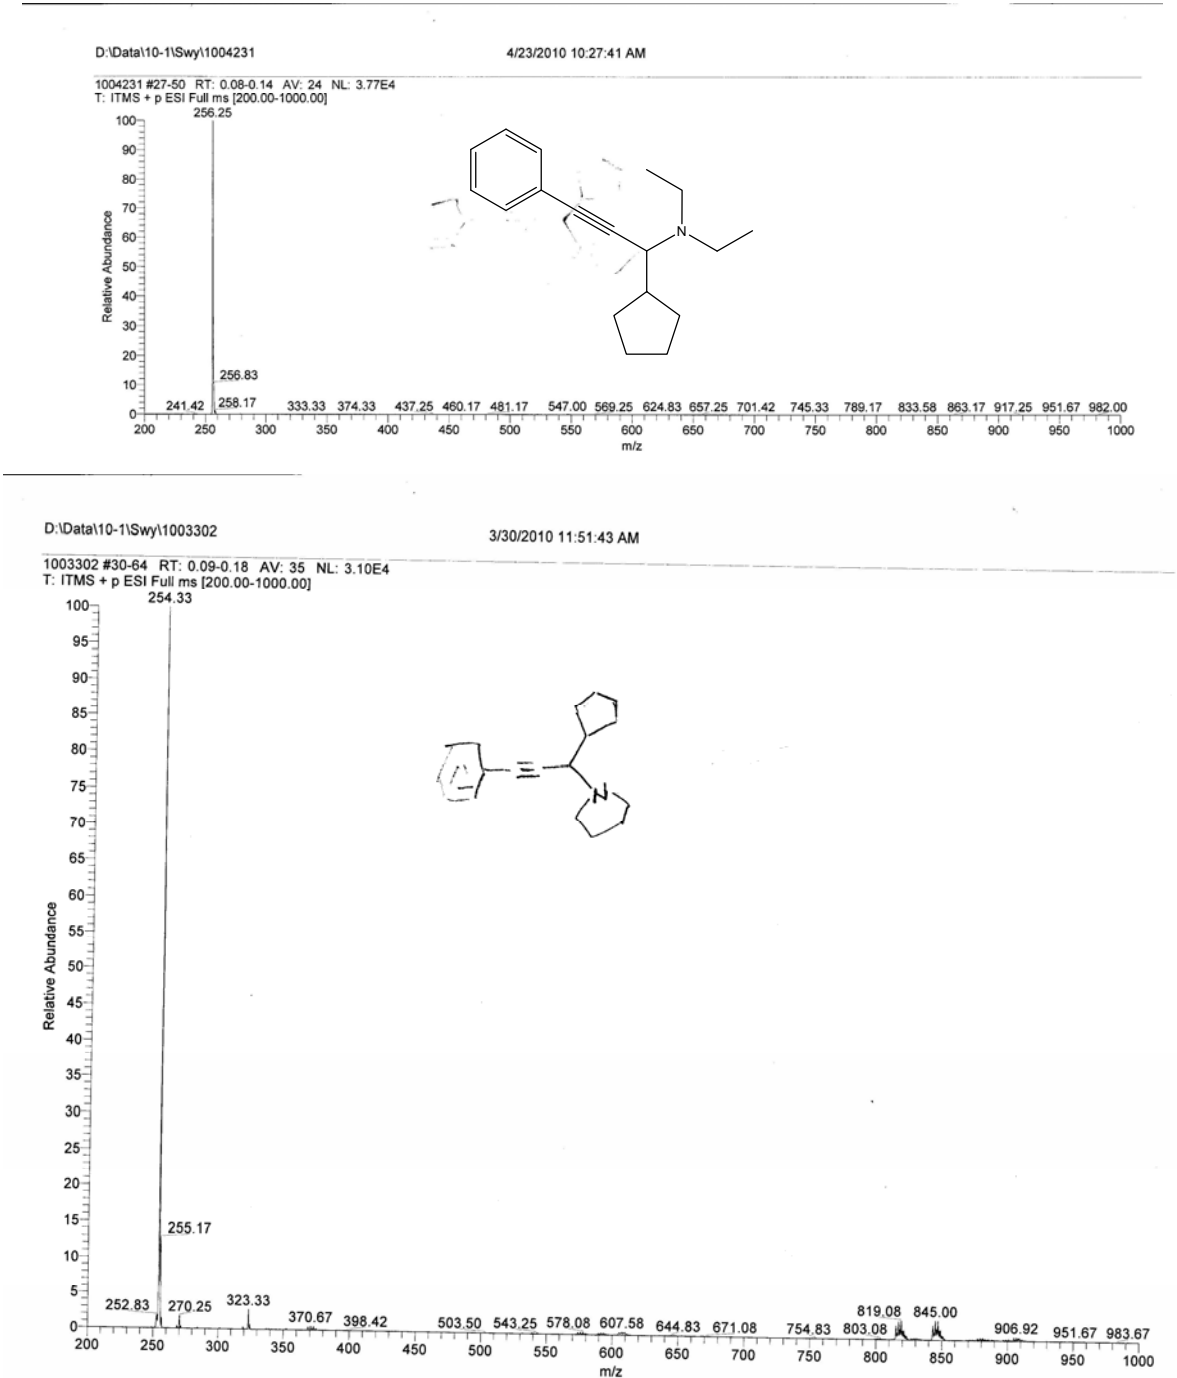



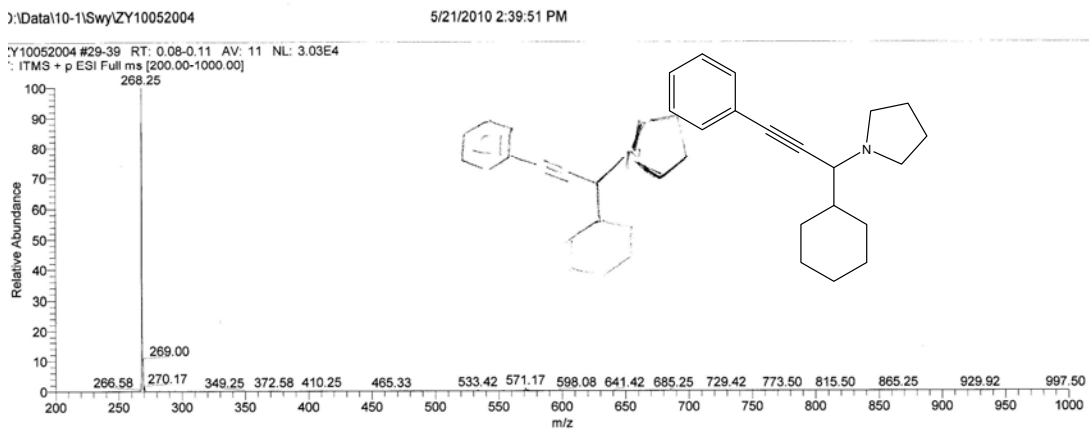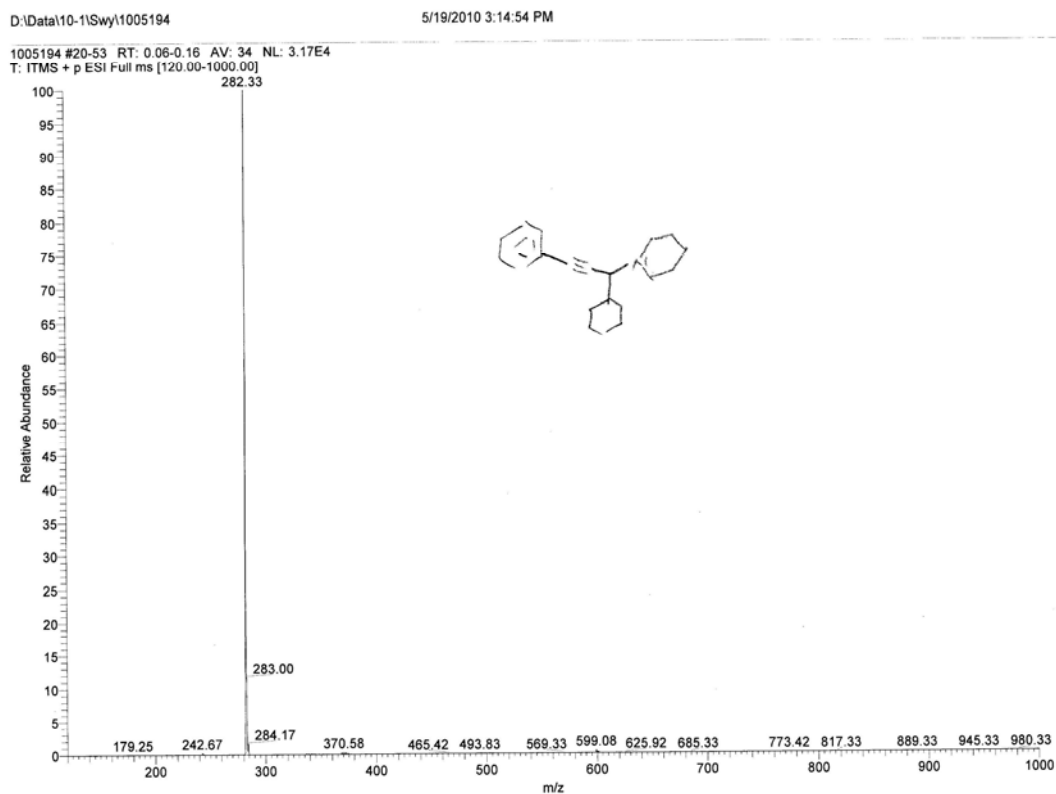

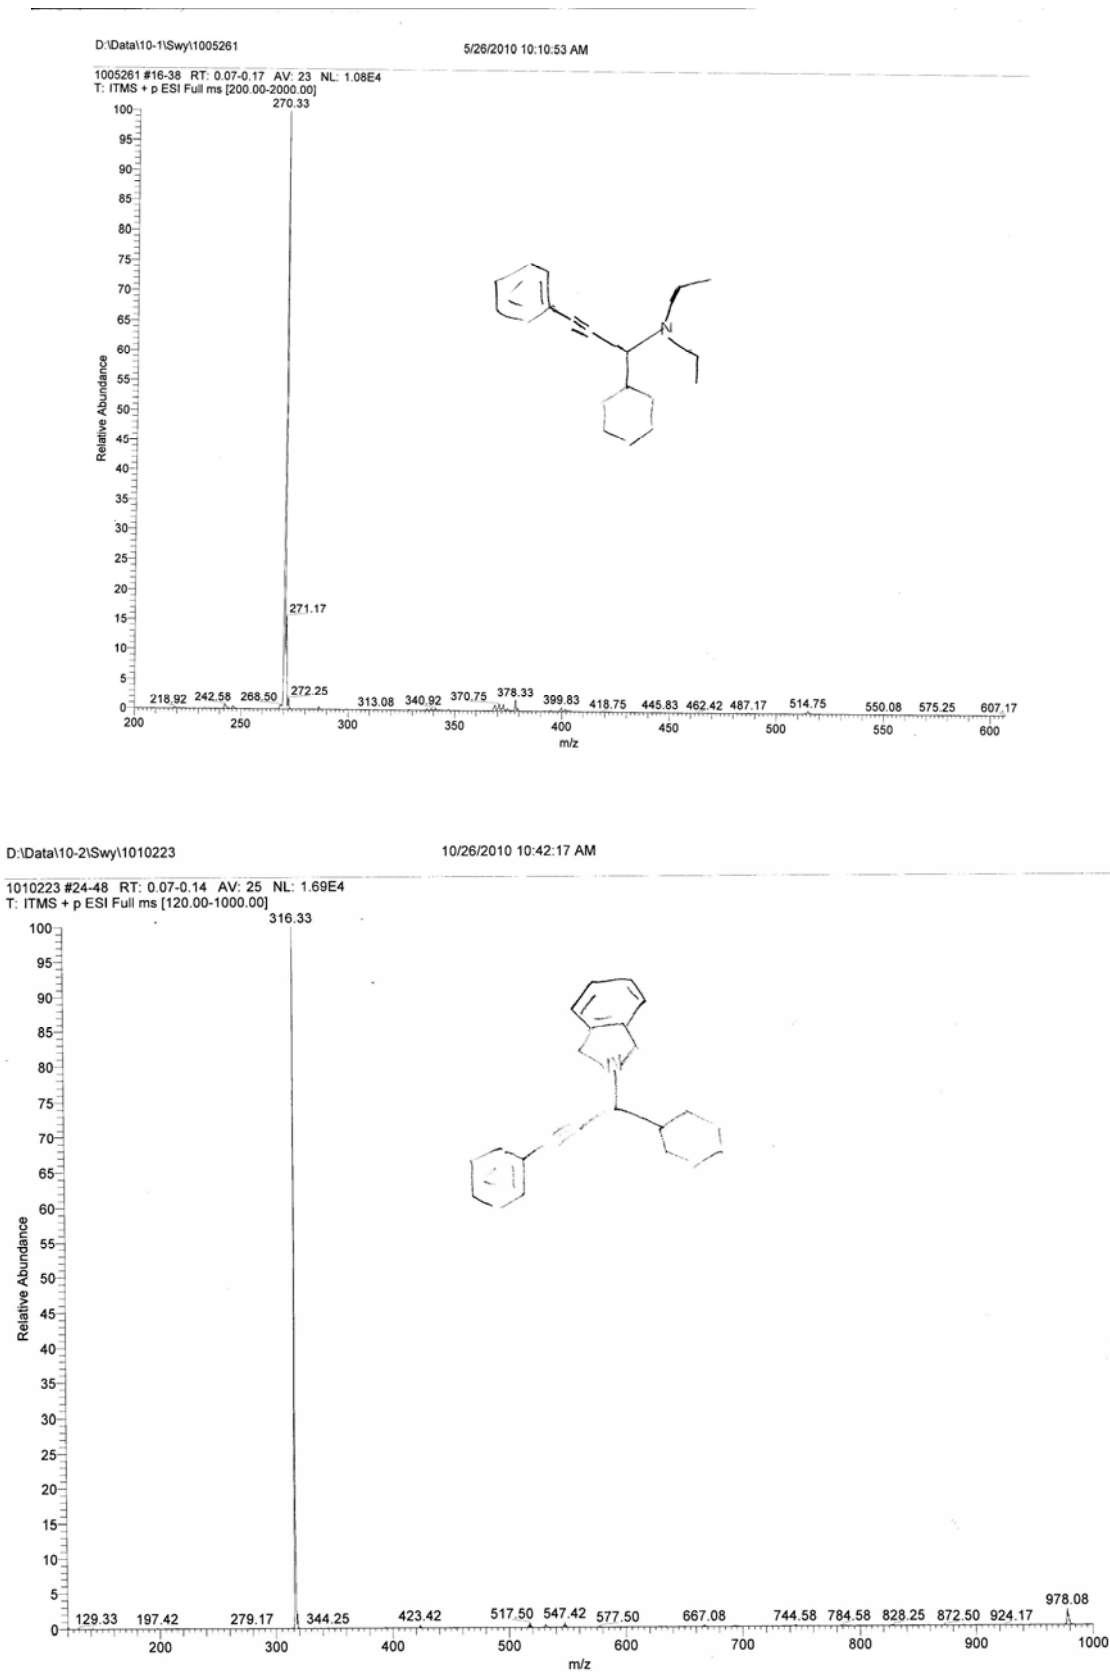

zy0928 #25-60 RT: 0.07-0.18 AV: 36 NL: 9.46E2  
T: ITMS + p ESI Full ms [120.00-1000.00]

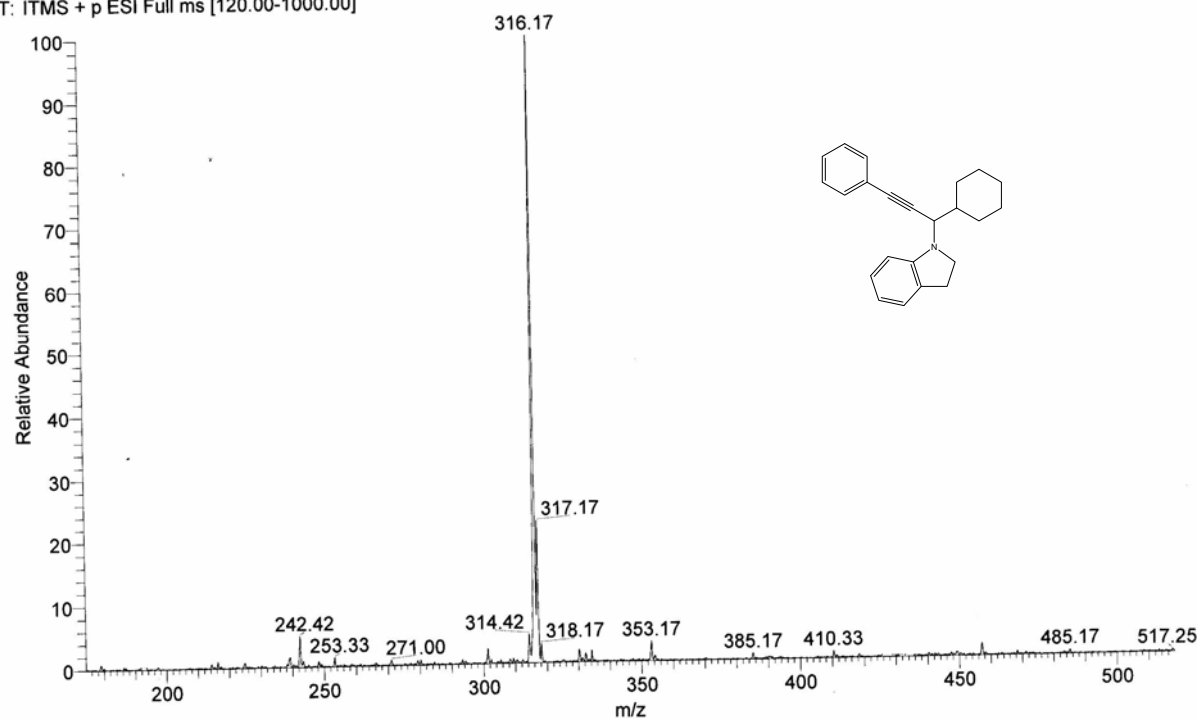

D:\Data\10-2\Swy\1010081

10/8/2010 5:10:09 PM

1010081 #28-49 RT: 0.08-0.15 AV: 22 NL: 5.31E3  
T: ITMS + p ESI Full ms [120.00-1000.00]

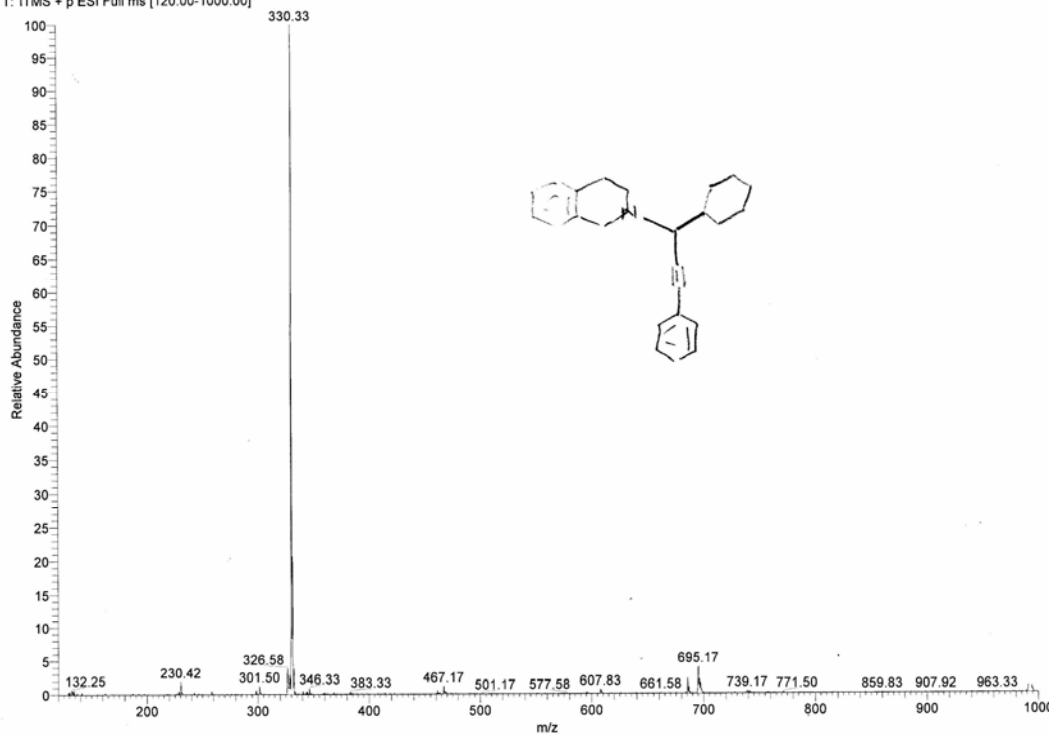

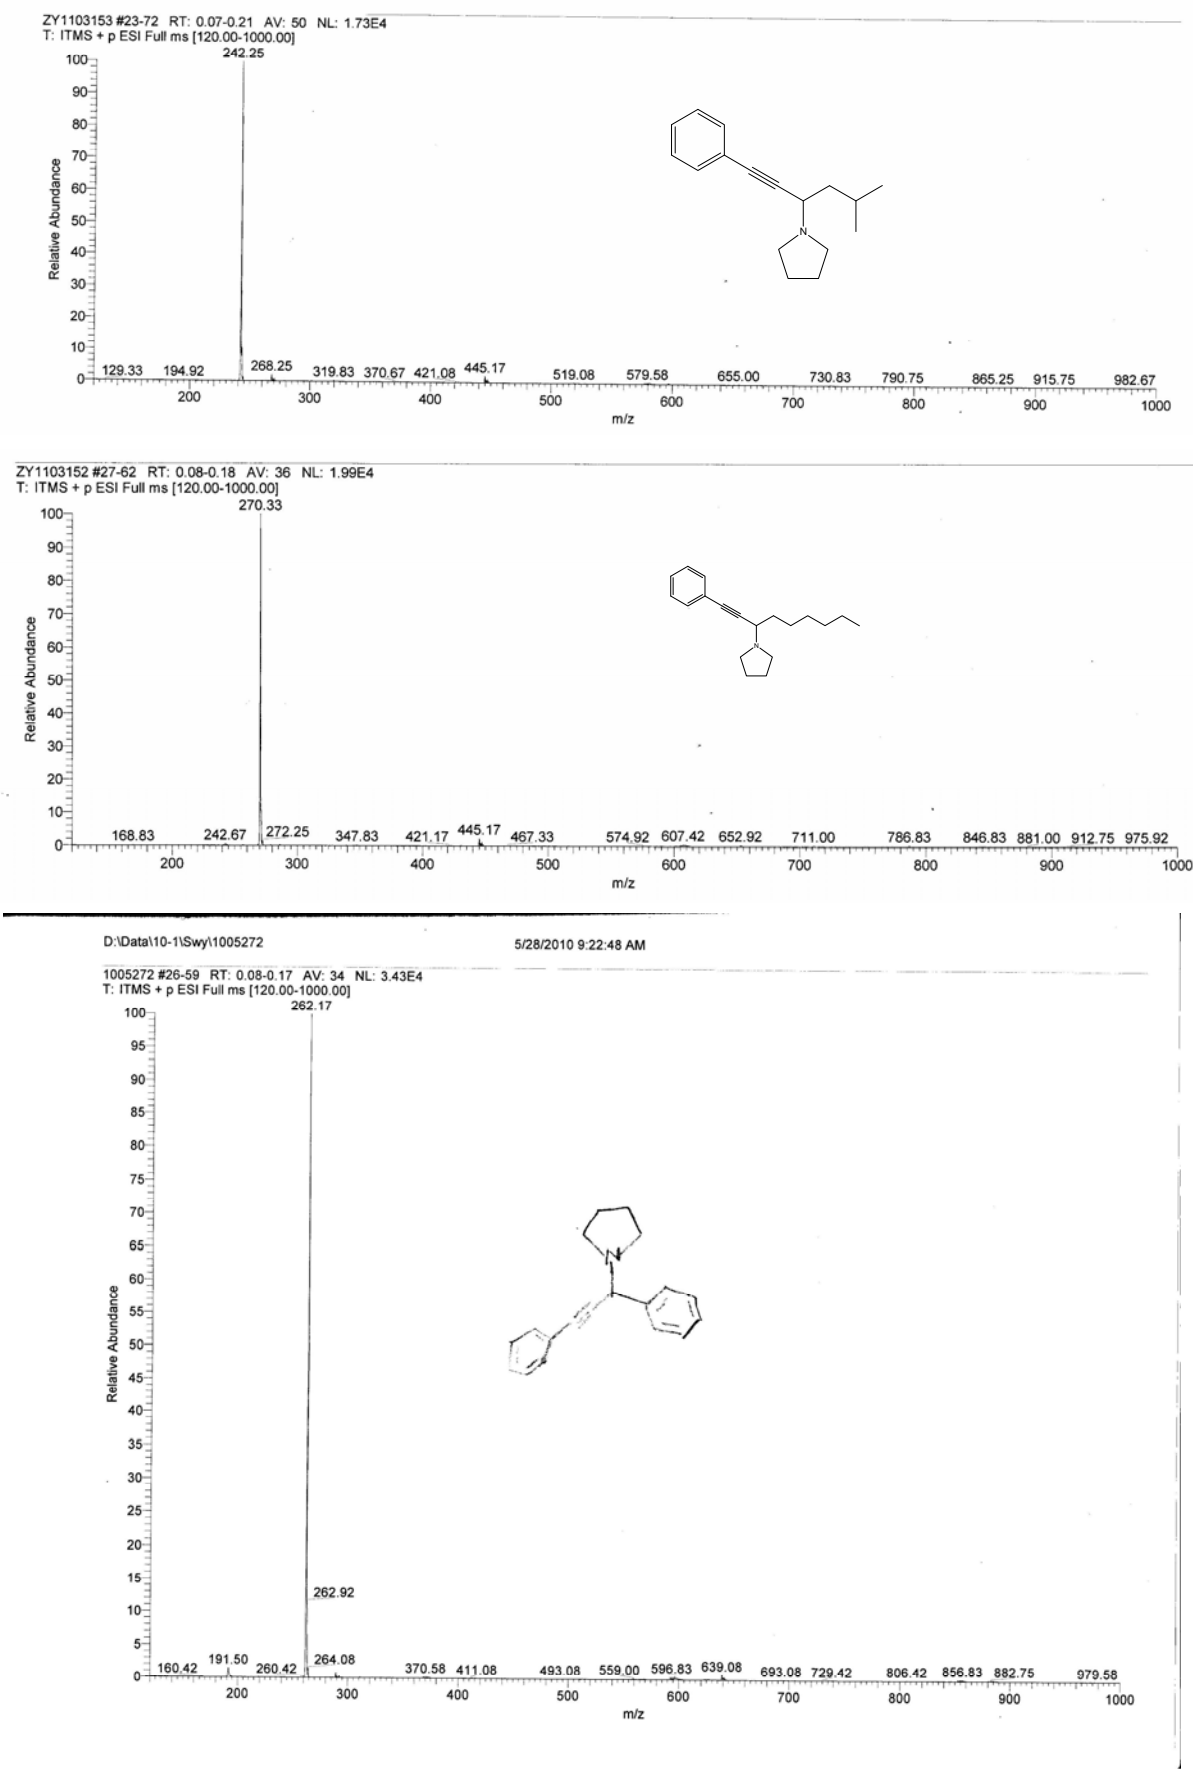

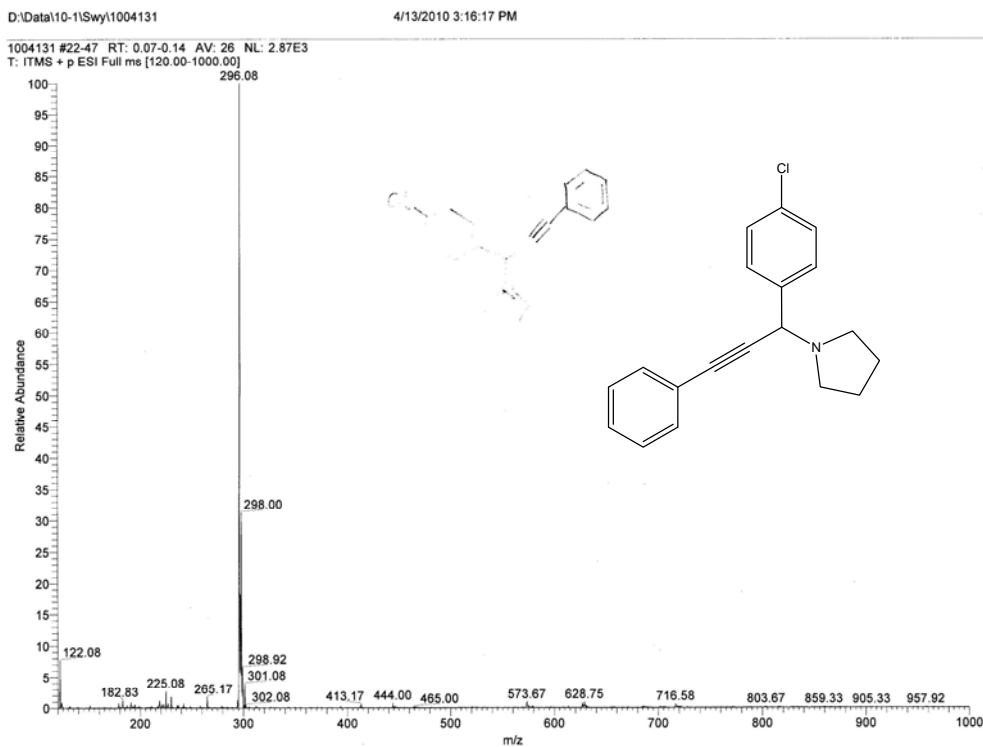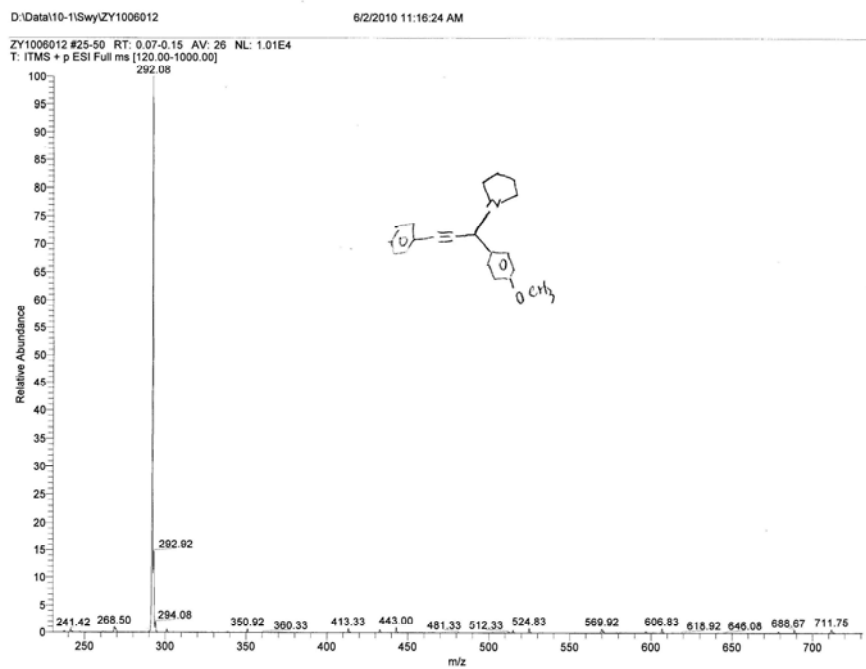

Supplement: c2dt30134b.pdf [file c2dt30134b.pdf]
